# Supplementary material for: MEDFATE 2.9.3: a trait-enabled model to simulate Mediterranean forest function and dynamics at regional scales
Source: Copernicus journal article supplement (doi:10.5194/gmd-16-3165-2023), 2023-06-06
Supplement: Supplementary file 1 [file gmd-16-3165-2023-supplement.zip]

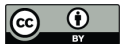

*Supplement of*

**MEDFATE 2.9.3: a trait-enabled model to simulate Mediterranean forest function and dynamics at regional scales**

**Miquel De Cáceres et al.**

*Correspondence to:* Miquel De Cáceres ([miquelcaceres@gmail.com](mailto:miquelcaceres@gmail.com))

- [gmd-16-3165-2023-supplement-title-page.pdf](#)
- [S1\\_SupplementaryTables.xlsx](#)
- [S1\\_SupplementaryTables\\_Captions.docx](#)

The copyright of individual parts of the supplement might differ from the article licence.
